RESEARCH ARTICLE

# Detecting useful genetic markers and reconstructing the phylogeny of an important medicinal resource plant, *Artemisia selengensis*, based on chloroplast genomics

Dong Meng<sup>1,2</sup>, Zhou Xiaomei<sup>1,2</sup>, Ku Wenzhen<sup>1</sup>, Zhenggang Xu<sup>1,2\*</sup>

**1** College of Materials and Chemical Engineering, Hunan City University, Yiyang, Hunan, China, **2** Hunan Research Center of Engineering Technology for Utilization of Environmental and Resources Plant, Central South University of Forestry and Technology, Changsha, China

\* [rssq198677@163.com](mailto:rssq198677@163.com)

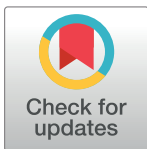

**OPEN ACCESS**

**Citation:** Meng D, Xiaomei Z, Wenzhen K, Xu Z (2019) Detecting useful genetic markers and reconstructing the phylogeny of an important medicinal resource plant, *Artemisia selengensis*, based on chloroplast genomics. PLoS ONE 14(2): e0211340. <https://doi.org/10.1371/journal.pone.0211340>

**Editor:** Tzen-Yuh Chiang, National Cheng Kung University, TAIWAN

**Received:** July 31, 2018

**Accepted:** January 13, 2019

**Published:** February 4, 2019

**Copyright:** © 2019 Meng et al. This is an open access article distributed under the terms of the [Creative Commons Attribution License](https://creativecommons.org/licenses/by/4.0/), which permits unrestricted use, distribution, and reproduction in any medium, provided the original author and source are credited.

**Data Availability Statement:** All sequence files are available from the NCBI database (accession number MH042532).

**Funding:** This work was supported by the Natural Science Foundation of Hunan Province (2016JJ4015 to DM) and the Key Technology R&D Program of Hunan Province under Grant (2016TP2007, 2016NK2148, 2016TP1014 to DM). The funders had no role in study design, data

## Abstract

*Artemisia selengensis* is not only a health food, but also a well-known traditional Chinese medicine. Only a fraction of the chloroplast (cp) genome data of *Artemisia* has been reported and chloroplast genomic materials have been widely used in genomic evolution studies, molecular marker development, and phylogenetic analysis of the genus *Artemisia*, which makes evolutionary studies, genetic improvement, and phylogenetic identification very difficult. In this study, the complete chloroplast genome of *A. selengensis* was compared with that of other species within *Artemisia* and phylogenetic analyses was conducted with other genera in the Asteraceae family. The results showed that *A. selengensis* is an AT-rich species and has a typical quadripartite structure that is 151,215 bp in length. Comparative genome analyses demonstrated that the available chloroplast genomes of species of *Artemisia* were well conserved in terms of genomic length, GC contents, and gene organization and order. However, some differences, which may indicate evolutionary events, were found, such as a re-inversion event within the *Artemisia* genus, an unequal duplicate phenomenon of the *ycf1* gene because of the expansion and contraction of the IR region, and the fast-evolving regions. Repeated sequences analysis showed that *Artemisia* chloroplast genomes presented a highly similar pattern of SSR or LDR distribution. A total of 257 SSRs and 42 LDRs were identified in the *A. selengensis* chloroplast genome. The phylogenetic analysis showed that *A. selengensis* was sister to *A. gmelinii*. The findings of this study will be valuable in further studies to understand the genetic diversity and evolutionary history of Asteraceae.

## Introduction

Asteraceae, the largest and the most diverse flowering plant family, currently has 32,913 accepted species in 1,911 genera and 13 subfamilies [1–3]. *Artemisia* L. (Asteraceae), as the largest genus in the Tribe Anthemideae, is widespread in mid- to high-latitudes and even dominates most cold and many warm deserts in the Northern Hemisphere. Numerous species of *Artemisia* are used as herbal medicines in many countries. For example, *A. annua* and *A.*

collection and analysis, decision to publish, or preparation of the manuscript.

**Competing interests:** The authors have declared that no competing interests exist.

*mexicana* produce antimalarial drugs [4–6], and artemisinin (from *A. annua*), first isolated and tested in the 1970s in China, is an active substance against malaria [7]. In particular, having good taste and rich nutrition, *A. selengensis* has long been used as a health food source and is sometimes directly eaten. Some extracted substances, especially from the leaves and roots, have antitumor, antioxidant, and free radical scavenging activities, and the plant is also a well-known traditional medicine because of its potent effects [8, 9]. Therefore, considering the important medicinal values of *A. selengensis* and the importance of *Artemisia* species as resource plants, comprehensive phylogenetic and genetic/genomic studies to increase our knowledge of this genus are important.

In angiosperms, the chloroplast with conserved quadripartite circular genomic structure [10] is a uniparentally inherited organelle. It originates from a cyanobacteria-like organism through an endosymbiosis event [11] and contains closely arrayed polycistronic transcribed gene clusters [12–14]. As a result, large-scale evolutionary events in related species, such as gene deletions or additions and gene order changes, are not common [15]. Therefore, cp genomes are widely used to determine evolutionary patterns [16], phylogenetic analysis [17], and comparative genomic analysis between angiosperm, gymnosperm, and fern families [18].

In the past, because of the number of species, diverse morphological types, ploidy, and complicated genetic relationships of *Artemisia*, the taxonomic relationships of the genus are controversial and based only on morphological traits, such as the capitula type and floret fertility [19, 20]. As a result, considering the conserved structural and relatively compact gene density, chloroplast genomic materials are widely used in genomic evolution studies, molecular marker development, and phylogenetic analysis of the genus *Artemisia*. Many researchers have used single gene data (*matK*, *ndhF*, *rps11*), IGS data (*psbA-trnH*, *trnS-trnC*, *trnS-trnfM*, *trnL-trnF*), and shared protein-coding gene data of *Artemisia* to perform phylogenetic analysis [19–27]. However, the cp genomic data of *Artemisia* are still quite limited and data for only a few species have been reported.

Therefore, we sequenced and annotated the complete cp genome of *A. selengensis* and compared it with other species within *Artemisia* and other genera (*Chrysanthemum*, *Soliva*, *Diplosiphium*, *Cynara*) within the Asteraceae family. Our study aimed to detect useful genetic markers and genetic materials, and to reconstruct its phylogeny. This study will be useful in further studies in that it will illuminate the genetic diversity and evolutionary history of Asteraceae.

## Materials and methods

### Ethics statement

The plant sampling was collected in areas that were not privately owned or protected in any way and no specific permits were required for this study.

### Plant material and high throughput sequencing

The sample was collected from the Dongting Lake region (28° 48′ 46.06″N, 112° 21′ 10.19″E). Firstly, we collected mature leaves of *A. selengensis* and put them in a container with liquid nitrogen. Then, leaves were stored at -80°C until sequencing. The extraction of total cp DNA was conducted according to the method of Zhang [28].

### Chloroplast genome assembly and annotation

The cp DNA of *A. selengensis* was fragmented using Covaris M220 (Covaris, USA). The whole-genome sequencing and the PE library construction was conducted according to the

method of Zhang [29]. Approximately 2G of raw data were obtained through next generation sequencing with paired-end 125 bp read length. After filtering using Trimmomatic v 0.32, clean data were obtained for subsequent analysis [30].

The quality of the sequencing data of the samples was visually evaluated using the software Fastqc v 0.10.0 and low-quality reads were filtered using quality control [31]. Then, we used SOAP denovo2 to assemble all good-quality paired reads to contigs [32]. Assembled contigs were joined into multiple scaffolding using SSPACE [33] to obtain the whole-genome sequence. In this process, different K-mers were selected firstly for assembly, the best k-mer was obtained to adjust the other parameters (-d -u -R -F, etc.), and then the preliminary assembly results were obtained again. Finally, GapCloser [32] software was used for optimization and gap filling to obtain the final assembly results. We filtered out fragments below 500 bp for evaluation, statistical analysis, and subsequent gene prediction.

The predicted annotation of the complete cp genome was performed by using the programs CpGAVAS and DOGMA [34] with default values. Then, the annotation results were stored in GFF3 format and checked manually, and codon positions were adjusted using Apollo [35]. OGDRAW v1.2 [36, 37] was used to visualize the gene features of the *A. selengensis* genome. The other more details about material collection, sequencing, annotation can be obtained from the announcement [38]. Furthermore, codon usage and the relative synonymous codon usage (RSCU) of the *A. selengensis* cp genome were confirmed using DAMBE6 [39] based on the protein-coding sequences.

## Comparative analysis

Over the course of evolution, genomes can undergo many small and large-scale changes. To find large-scale evolutionary events in *A. selengensis*, we analyzed the genome rearrangement and the contraction/expansion of the IRs regions by comparing them with that of 8 related species in the Asteraceae family, as follows: *A. capillaris* (KU736963) [25], *A. frigida* (JX293720) [23], *A. gmelinii* (KU736962) [25], *A. montana* (KF887960), *Chrysanthemum boreale* (MG913594) [40], *S. sessilis* (KX063863) [41], *D. glutinosum* (KX063897) [41], and *C. humilis* (KP299292) [42]. The genome rearrangement analyses of nine Asteraceae species relative to *C. humilis* was performed in Mauve Alignment [43]. The contraction/expansion of the IRs regions of the nine Asteraceae species relative to *A. selengensis* was visualized using Microsoft Visio 2016.

To obtain comprehensive knowledge of the genomic variation, pairwise distances of inter-genic spacers (IGSs), and introns, protein-coding sequences of the nine Asteraceae species relative to *A. selengensis* were calculated. First, we extracted a total of 83 IGSs with at least 100 bp, and 17 introns shared by these species, and performed sequence alignment using MAFFT v7.380 [44] under the FFT-NS-2 setting. At the same time, 80 protein-coding sequences were extracted and aligned in MEGA7 [45] with the ClustalW (Codons) program. Then, pairwise distances of IGSs and introns were determined by using MEGA7 [45] with Kimura's two parameter (K2P) model [46]. Additionally, sequence divergence of homologous protein-coding genes was estimated according to Keller's method [47] using the synonymous (Ks) and non-synonymous (Ka) nucleotide substitution rates with the yn00 program [48] from the PAML package [49]. Finally, a two independent samples t-test was performed to evaluate the significance of the Ka/Ks ratio within and outside of the genus *Artemisia*.

## Repeated sequences analysis

We detected the type and number of repeated sequences across nine Asteraceae species (*A. selengensis*, *A. capillaris*, *A. frigida*, *A. gmelinii*, *A. montana*, *C. boreale*, *S. sessilis*, *D. glutinosum*, *C. humilis*) to find useful genetic/genomic makers. These repeated sequences were divided

into two categories: (i) simple sequence repeats (SSRs or microsatellites) with 1–6 bp long repeat motifs, (ii) longer dispersed repeats (LDRs) with at least 30 bp long repeat motifs. We used MISA Perl Script [50] that was written by a Perl program to determine SSRs in the *A. selengensis* cp genome. The minimum number of repeats was set to 8, 4, 4, 3, 3, 3 for mono-, di-, tri-, tetra-, penta-, and hexa-nucleotide SSRs, respectively. Then, LDRs, including tandem (T), forward (F), palindrome (P), reverse (R), and complement (C) repeats, were identified. Tandem Repeats Finder version 4.09 [51] with default settings was used to detect tandem repeats. These repeats with  $n \geq 30$  bp and a sequence identity  $\geq 90\%$  were selected. REPuter [52] was used to visualize forward, palindrome, reverse, and complement sequences with the parameter settings of 3 for Hamming distance and 30 bp for minimum repeat size.

## Phylogenetic analysis

Five datasets, including the complete cp genome, LSC, IR, and SSC DNA sequences, and 72 shared protein sequences of 28 published Asteraceae species and *A. selengensis*, were used to accomplish the phylogenetic analysis. The neighbor-joining (NJ) method was used to determine the phylogenetic relationships. The probability bootstrap analysis of each branch was calculated with 1000 replications. The online software Interactive Tree of Life (iTOL) was used to construct a phylogeny tree. The species were *Artemisia annua* (MF623173), *Artemisia argyi* (KM386991), *A. capillaris*, *A. frigida*, *Artemisia fukudo* (KU360270), *A. gmelinii*, *A. montana*, *C. boreale*, *Chrysanthemum indicum* (JN867589), *Chrysanthemum x morifolium* (JQ362483), *S. sessilis*, *Leontopodium leirolepis* (KM267636), *Anaphalis sinica* (KX148081), *Aster spathulifolius* (KF279514), *D. glutinosum*, *Diplostephium romeroi* (KX063911), *Heterothalamus alienus* (KX063869), *Oritrophium peruvianum* (KX063861), *Conyza bonariensis* (MF276802), *Hinterhubera ericoides* (KX063910), *Laestadia muscicola* (KX063873), *Floscaldasia hypsophila* (KX063916), *Archibaccharis asperifolia* (KX063859), *Lagenophora cuchumatana* (KX063879), *Guizotia abyssinica* (EU549769), *Mikania micrantha* (KX154571), *C. cornigera*, and *C. humilis*. *C. cornigera* and *C. humilis* were selected as the out group.

BLAST 2.8.1 [53] was used to align and perform NJ analyses of the complete cp genome, LSC, IR, and SSC DNA sequences, together with MEGA 7.0 [54] for 72 shared protein sequences alignment and NJ analyses. The results were stored as a Newick tree file for constructing a phylogeny tree.

## Results

### Features of complete chloroplast genome

The *A. selengensis* cp genome with GenBank accession number: MH042532 was announced by our research group [38]. The complete cp genome of *A. selengensis* had a typical quadripartite structure and was 151,215 bp in length (Table 1). The GC content of the whole genome, LSC, SSC, and IR regions were 37.46%, 35.55%, 30.81%, and 43.09%, respectively. The higher GC content of the IR regions was probably caused by the presence of all four ribosomal RNA genes duplicated in these regions [55] (Table 1). Furthermore, AT content of the 1st, 2nd, and 3rd positions of the codons were 54.1%, 61.9%, and 70.2%, respectively (Table 1).

A total of 114 unique genes, including 80 protein-coding, 30 tRNA, and four rRNA genes, were found (Fig 1, Table 2). Among these genes, 19 genes (*atpF*, *clpP*, *ndhA*, *ndhB* $\times$ 2, *petB*, *petD*, *rpl2* $\times$ 2, *rpl16*, *rps16*, *rpoC1*, *trnA-UGC* $\times$ 2, *trnG-UCC*, *trnK-UUU*, *trnI-GAU* $\times$ 2, *trnL-UAA*, *trnV-UAC*, *ycf3*) contained a single intron, whereas two genes, *ycf3* and *clpP*, contained two introns (Table 3).

A total of 25,926 codons were translated into 88 protein-coding sequences by 30 unique tRNA genes (Tables 1 and 4). By analyzing codon usage and the relative synonymous codon

**Table 1. Base compositions in the *A. selengensis* chloroplast genome.**

| Location             | T/U (%) | C (%) | A (%) | G (%) | Length (bp) |
|----------------------|---------|-------|-------|-------|-------------|
| Genome               | 31.28   | 18.67 | 31.26 | 18.79 | 151215      |
| tRNA genes           | 22.66   | 26.73 | 24.59 | 26.02 | 2798        |
| rRNA genes           | 22.46   | 27.54 | 22.46 | 27.54 | 9048        |
| Introns region       | 32.31   | 18.86 | 30.75 | 18.07 | 17240       |
| Protein-coding genes | 31.54   | 17.75 | 30.53 | 20.19 | 77778       |
| Intergenic region    | 33.34   | 16.07 | 34.23 | 16.36 | 44274       |
| 1st positon          | 23.50   | 19.08 | 30.58 | 26.84 | 25926       |
| 2nd positon          | 32.70   | 20.39 | 29.21 | 17.70 | 25926       |
| 1st+2nd positon      | 28.10   | 19.73 | 29.90 | 22.27 | 51852       |
| 3rd positon          | 38.42   | 13.78 | 31.78 | 16.02 | 25926       |

<https://doi.org/10.1371/journal.pone.0211340.t001>

usage (RSCU) of protein-coding sequences of the *A. selengensis* cp genome, we found that AUU and UGC accounted for the highest and lowest codon usage, respectively. Furthermore, non-preferred synonymous codons (RSCU < 1) with 32 codons is more than preferred synonymous codons (RSCU > 1) with 28 codons. The start codon AUG and UGG were non-bias codons (RSCU = 1). We also found that all preferred synonymous codons ended with A/T nucleotides and 93.75% non-preferred synonymous codons ended with G/C (Table 4).

### Comparative chloroplast genomic analysis

**Genome features comparison of nine Asteraceae species.** We compared *A. selengensis* with its related species, including four species from *Artemisia* and four species from other genera: *Chrysanthemum*, *Soliva*, *Diplostephium*, and *Cynara* (Table 5). Among them, the length of the cp genomes of the nine species ranged from 150,784 (*S. sessilis*) bp to 152,585 bp (*C. humilis*). The genomic length within the *Artemisia* genus was similar, ranging from 151,056 bp (*A. capillaris*) to 151,318 bp (*A. gmelinii*) with only a 255 bp difference. The LSC region accounted for 54.77%–54.89% of the whole genome, whereas the SSC and IRs regions accounted for 12.12%–12.17% and 16.50%–16.53%, respectively. In terms of gene organization, *Artemisia* species appeared to be well conserved with 21 genes containing introns and 114 unique genes, including 80 protein-coding genes, 30 tRNA genes, and four rRNA genes.

**Large-scale evolutionary events in the chloroplast genome of *A. selengensis*.** Additionally, the genomic rearrangement of nine Asteraceae species relative to *C. humilis* showed that the SSC region of five species within the *Artemisia* genus had no rearrangement but was inverted in comparison with other genera. All species in our study were highly syntenic and similar in their LSC and IRs regions (Fig 2).

The expansion and contraction of the IR region was the most common evolutionary event in the evolution of the genome, and they are hypothesized to explain size differences between cp genomes [24]. Therefore, we compared the IR/SSC and IR/LSC boundaries of the nine species relative to *A. selengensis* (Fig 3). The LSC/IRa border generally was positioned at the *rps19* gene with 211–218 bp in LSC, 60–67 bp in IRa. Normally, *rpl2* and *trn-H* are positioned at the IRb/SSC boundary, but we also found a pseudogene *rps19* at the IRb/SSC boundary of *A. frigida*, *A. montana*, *S. sessilis*, *D. glutinosum*, and *C. humilis*. The IRa/SSC and SSC/IRb borders of intro-generic species and inter-generic species were different because of different gene order in SSC. In our study, the *ycf1* gene had a duplicate phenomenon in the cp genome, but the length of these two genes were different. The shorter one set as *ycf1\_1* ranged from 557 to 660 bp, and the longer one set as *ycf1\_2* ranged from 3,111 to 5,085 bp. In intro-generic species, *ycf1\_1* and *ndhF* were located at the IRa/SSC border, whereas *rps15* and *ycf1\_2* were at

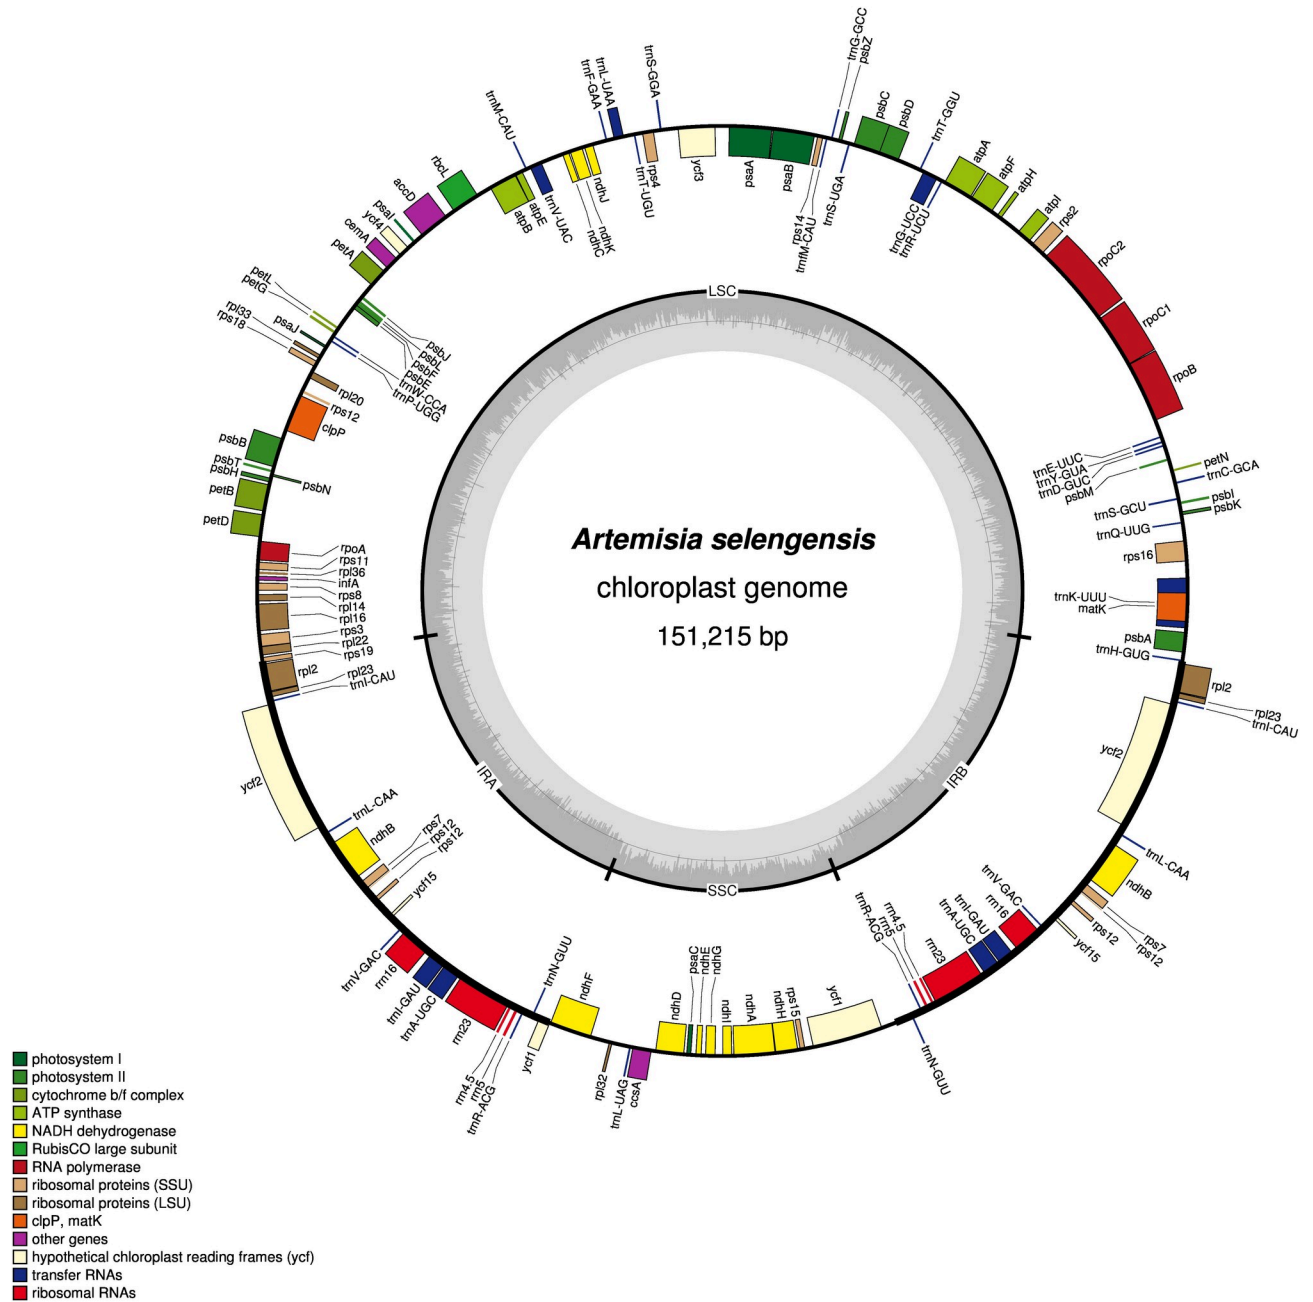

**Fig 1. Gene map of the complete chloroplast genome of *A. selengensis*.** Genes lying inside of the circle are transcribed clockwise, and those outside are transcribed counterclockwise. Different color of blocks represent different functional groups. The darker gray color of the inner circle corresponds to the GC content, and the lighter gray color corresponds to the AT content.

<https://doi.org/10.1371/journal.pone.0211340.g001>

the SSC/IRb border, which was opposite in inter-generic species. The pseudogene *ycf1\_1*, ranging from 557 to 558 bp, in *A. frigida*, *A. montana*, *S. sessilis*, *D. glutinosum*, and *C. humilis* was expressed in four species, ranging from 576 to 660 bp. It is hypothesized that the *ycf1* gene plays an important role in genome evolution. We also found that the *ycf1* gene overlapped with the *ndhF* gene at the IRA/SSC boundary in *A. capillaris* and the SSC-IRb boundary in *C. humilis*.

**Table 2. Genes predicted in the chloroplast genome of *A. Selengensis*.**

| Category                  | Group of genes                      | Name of genes                                                                                                                                                                                                                                                                                                                                                                                          |
|---------------------------|-------------------------------------|--------------------------------------------------------------------------------------------------------------------------------------------------------------------------------------------------------------------------------------------------------------------------------------------------------------------------------------------------------------------------------------------------------|
| Self-replication          | Large subunit of ribosomal proteins | <i>rpl2<sup>a</sup>, rpl14, rpl16, rpl20, rpl22, rpl23<sup>a</sup>, rpl32, rpl33, rpl36</i>                                                                                                                                                                                                                                                                                                            |
|                           | Small subunit of ribosomal proteins | <i>rps2, rps3, rps4, rps7<sup>a</sup>, rps8, rps11, rps12<sup>a,b</sup>, rps14, rps15, rps16, rps18, rps19</i>                                                                                                                                                                                                                                                                                         |
|                           | DNA dependent RNA polymerase        | <i>rpoA, rpoB, rpoC1, rpoC2</i>                                                                                                                                                                                                                                                                                                                                                                        |
|                           | rRNA genes                          | <i>rrn16S<sup>a</sup>, rrn4.5S<sup>a</sup>, rrn5S<sup>a</sup>, rrn23<sup>a</sup></i>                                                                                                                                                                                                                                                                                                                   |
|                           | tRNA genes                          | <i>trnA-TGC<sup>a</sup>, trnC-GCA, trnD-GTC, trnE-TTC, trnF-GAA, trnFM-CAT, trnG-GCC, trnG-TCC, trnH-GTG, trnI-CAT<sup>a</sup>, trnI-GAT<sup>a</sup>, trnK-TTT, trnL-CAA<sup>a</sup>, trnL-TAA, trnL-TAG, trnM-CAT, trnN-GTT<sup>a</sup>, trnP-TGG, trnQ-TTG, trnR-ACG<sup>a</sup>, trnR-TCT, trnS-GCT, trnS-GGA, trnS-TGA, trnT-GGT, trnT-TGT, trnV-GAC<sup>a</sup>, trnV-TAC, trnW-CCA, trnY-GTA</i> |
| Photosynthesis            | Photosystem I                       | <i>psaA, psaB, psaC, psaI, psaJ</i>                                                                                                                                                                                                                                                                                                                                                                    |
|                           | Photosystem II                      | <i>psbA, psbB, psbC, psbD, psbE, psbF, psbH, psbI, psbJ, psbK, psbL, psbM, psbN, psbT, psbZ</i>                                                                                                                                                                                                                                                                                                        |
|                           | NADH dehydrogenase                  | <i>ndhA, ndhB<sup>a</sup>, ndhC, ndhD, ndhE, ndhF, ndhG, ndhH, ndhI, ndhJ, ndhK</i>                                                                                                                                                                                                                                                                                                                    |
|                           | Cytochrome b6/f complex             | <i>petA, petB, petD, petG, petL, petN</i>                                                                                                                                                                                                                                                                                                                                                              |
|                           | ATP synthase                        | <i>atpA, atpB, atpE, atpF, atpH, atpI</i>                                                                                                                                                                                                                                                                                                                                                              |
|                           | Rubisco                             | <i>rbcl</i>                                                                                                                                                                                                                                                                                                                                                                                            |
| Other genes               | Translational initiation factor     | <i>infA</i>                                                                                                                                                                                                                                                                                                                                                                                            |
|                           | Maturase                            | <i>matK</i>                                                                                                                                                                                                                                                                                                                                                                                            |
|                           | Protease                            | <i>clpP</i>                                                                                                                                                                                                                                                                                                                                                                                            |
|                           | Envelop membrane protein            | <i>cemA</i>                                                                                                                                                                                                                                                                                                                                                                                            |
|                           | Subunit Acetyl-CoA-Carboxylase      | <i>accD</i>                                                                                                                                                                                                                                                                                                                                                                                            |
|                           | C-type cytochrome synthesis gene    | <i>ccsA</i>                                                                                                                                                                                                                                                                                                                                                                                            |
| Genes of unknown function | Conserved Open reading frames       | <i>ycf1<sup>a</sup>, ycf2<sup>a</sup>, ycf3, ycf4, ycf15<sup>a</sup></i>                                                                                                                                                                                                                                                                                                                               |

<sup>a</sup> Duplicated gene

<sup>b</sup> Trans-splicing gene.

<https://doi.org/10.1371/journal.pone.0211340.t002>

**Sequence divergence between intro-generic species and inter-generic species.** To obtain a comprehensive knowledge on the variation in the protein-coding genes, introns, and intergenic spacers in the cp genome, we compared the K2p values of the intergenic spacers and introns and the Ka, Ks, and Ka/Ks ratio of the protein-coding genes of the nine Asteraceae species (Figs 4 and 5; S1, S2, S3 and S4 Tables). These species were divided into intro-generic species (within *Artemisia*: *A. selengensis*, *A. capillaris*, *A. frigida*, *A. gmelinii*, and *A. montana*) and inter-generic species (other genera of Asteraceae: *A. selengensis*, *C. boreale*, *S. sessilis*, *D. glutinosum*, and *C. humilis*). As expected, the IR region was much more conserved than the LSC and SSC regions because of lower K2p values. The sequences differences between species were significantly higher than those of the species within the genus ( $P < 0.05$ ). In intro-generic species, *ndhD\_psaC* (116 bp), *psaJ\_rpl33* (439 bp), *trnH-GUG\_psbA* (382 bp), *rps18\_rpl20* (264 bp), *ccsA\_ndhD* (200 bp), and *rpl32\_trnL-UAG* (880 bp) presented higher K2p values. The most variable intron in *Artemisia* was *trnK-UUU* and the second intron of *clpP*. The most divergence intergenic sequences between *A. selengensis* and species of other genera were *rpl32\_trnL-UAG*, *psbI\_trnS-GCU*, *atpA\_trnR-UCU*, *rpl16\_rps3*, and *trnH-GUG\_psbA*, whereas the most variable intron was *rps16* (Fig 4).

A comparison among the protein-coding genes showed that the mean Ka among the five *Artemisia* species ranged from 0 (contained 45 genes) to *psbH* (0.0119) and the mean Ks

**Table 3. Length of introns and exons of the split genes in the *A. Selengensis* complete chloroplast genome.**

| Gene Name       | Gene Location |        |        | Length (bp) |         |         |          |          |
|-----------------|---------------|--------|--------|-------------|---------|---------|----------|----------|
|                 | Strand        | Start  | End    | Exon I      | Intro I | Exon II | Intro II | Exon III |
| <i>rps16</i>    | -             | 5190   | 6275   | 40          | 861     | 185     |          |          |
| <i>rpoC1</i>    | +             | 15912  | 18705  | 432         | 721     | 1641    |          |          |
| <i>atpF</i>     | +             | 26621  | 27874  | 145         | 699     | 410     |          |          |
| <i>ycf3</i>     | -             | 41826  | 43775  | 126         | 703     | 228     | 740      | 153      |
| <i>clpP</i>     | -             | 68800  | 70794  | 68          | 798     | 292     | 609      | 228      |
| <i>petB</i>     | +             | 73721  | 75113  | 6           | 745     | 642     |          |          |
| <i>petD</i>     | +             | 75302  | 76459  | 8           | 675     | 475     |          |          |
| <i>rpl16</i>    | -             | 79921  | 81347  | 9           | 1019    | 399     |          |          |
| <i>rpl2</i>     | -             | 83042  | 84530  | 393         | 661     | 435     |          |          |
| <i>ndhB</i>     | -             | 93079  | 95281  | 777         | 670     | 756     |          |          |
| <i>ndhA</i>     | -             | 117648 | 119820 | 553         | 1081    | 539     |          |          |
| <i>ndhB</i>     | +             | 138855 | 141057 | 777         | 670     | 756     |          |          |
| <i>rpl2</i>     | +             | 149606 | 151094 | 393         | 661     | 435     |          |          |
| <i>trnK-UUU</i> | -             | 1722   | 4340   | 37          | 2547    | 35      |          |          |
| <i>trnG-UCC</i> | -             | 29908  | 30705  | 23          | 728     | 47      |          |          |
| <i>trnL-UAA</i> | +             | 46606  | 47116  | 37          | 424     | 50      |          |          |
| <i>trnV-UAC</i> | -             | 51073  | 51719  | 38          | 572     | 37      |          |          |
| <i>trnI-GAU</i> | +             | 100805 | 101657 | 43          | 775     | 35      |          |          |
| <i>trnA-UGC</i> | +             | 101722 | 102606 | 38          | 812     | 35      |          |          |
| <i>trnA-UGC</i> | -             | 131530 | 132414 | 38          | 812     | 35      |          |          |
| <i>trnI-GAU</i> | -             | 132479 | 133331 | 43          | 775     | 35      |          |          |

<https://doi.org/10.1371/journal.pone.0211340.t003>

ranged from 0 (contained 29 genes) to 0.0316 (*infA*). However, the mean Ka among *A. selengensis* and other genera ranged from 0 (*atpH*, *petG*, *petN*, *psaC*, *psbA*, *psbE*, *psbF*, *psbI*, *psbJ*, *psbL*, *rpl36*) to 0.0533 (*ycf1\_2*) and the mean Ks ranged from 0 (*psbF* and *psbL*) to 0.1978 (*rpl36*). We also calculated the Ka/Ks ratio to evaluate whether selective pressure acted on protein-coding genes. In our study, within the genus *Artemisia*, *accD* evolved under beneficial mutations with a Ka/Ks ratio >1. Three genes (*rps12*, *ycf1\_2*, *ndhD*, ranging from 0.5000 to 0.6770) suffered from neutral selection with a Ka/Ks ratio >0.5. However, except for *rps12*, *ycf1\_2*, and *ndhD* there were none identified as neutrally evolving between *A. selengensis* and other genera, and *ycf1\_1*, *rpl33*, *accD*, and *psbH* exhibited neutrally evolution. Upon comparison of Ka/Ks ratios of *Vicia* to other genera species, 14 genes (*atpA*, *ndhB*, *ndhG*, *petB*, *psbC*, *psbD*, *psbH*, *psbZ*, *rpl22*, *rps11*, *rps14*, *rps16*, *rps4*, *ycf4*) were significantly higher ( $P < 0.05$ ), and the difference for *atpF*, *atpB*, *ndhD*, and *rpl14* was highly significant at  $P < 0.01$  (Fig 5).

### Repeated sequences

In our study, we found 257, 268, 259, 261, 256, 262, 220, 279, and 224 SSRs in *A. selengensis*, *A. capillaris*, *A. frigida*, *A. gmelinii*, *A. montana*, *C. boreale*, *S. sessilis*, *D. glutinosum*, and *C. humilis*, respectively (S5 Table). Among them, the mono-nucleotide was the most common SSR motifs, with 124, 133, 124, 119, 118, 125, 95, 121, 109 in the nine species. Penta-nucleotide and hexa-nucleotide SSRs were limited to only 1–3 for each species. By analyzing the types of SSRs, we found that the AT nucleotide was rich in SSRs. Among them, the content of the A/T mono-nucleotide motifs in *A. selengensis*, *A. capillaris*, *A. frigida*, *A. gmelinii*, *A. montana*, *C.*, *D. glutinosum*, and *C. humilis* was 98.4%, 98.5%, 99.2%, 98.3%, 98.3%, 98.4%, 100%, 97.5%, and 98.2%, respectively. Furthermore, the content of the AT/TA di-nucleotide motifs in these



**Table 4. The codon-anticodon recognition pattern and codon usage for *A.Selengensis* chloroplast genome Animo acid.**

| Animo acid | Codon | No.  | RSCU  | tRNA     | Animo acid | Codon | No. | RSCU  | tRNA     |
|------------|-------|------|-------|----------|------------|-------|-----|-------|----------|
| Ala        | GCU   | 365  | 1.565 | trnA-UGC | Pro        | CCA   | 409 | 1.504 | trnP-UGG |
| Ala        | GCG   | 132  | 0.566 |          | Pro        | CCC   | 236 | 0.868 |          |
| Ala        | GCC   | 210  | 0.9   |          | Pro        | CCU   | 306 | 1.125 |          |
| Ala        | GCA   | 226  | 0.969 |          | Pro        | CCG   | 137 | 0.504 |          |
| Cys        | UGU   | 305  | 1.063 | trnC-GCA | Gln        | CAA   | 630 | 1.491 | trnQ-UUG |
| Cys        | UGC   | 269  | 0.937 |          | Gln        | CAG   | 215 | 0.509 |          |
| Asp        | GAU   | 642  | 1.566 | trnD-GUC | Arg        | AGA   | 518 | 1.265 | trnR-ACG |
| Asp        | GAC   | 178  | 0.434 |          | Arg        | AGG   | 301 | 0.735 | trnR-UCU |
| Glu        | GAG   | 263  | 0.517 | trnE-UUC | Arg        | CGA   | 240 | 1.299 |          |
| Glu        | GAA   | 755  | 1.483 |          | Arg        | CGC   | 125 | 0.677 |          |
| Phe        | UUU   | 984  | 1.15  | trnF-GAA | Arg        | CGG   | 140 | 0.758 |          |
| Phe        | UUC   | 728  | 0.85  |          | Arg        | CGU   | 234 | 1.267 |          |
| Gly        | GGU   | 411  | 1.185 | trnG-GCC | Ser        | AGC   | 365 | 0.892 | trnS-GCU |
| Gly        | GGG   | 256  | 0.738 | trnG-UCC | Ser        | AGU   | 453 | 1.108 | trnS-GGA |
| Gly        | GGC   | 203  | 0.585 |          | Ser        | UCA   | 182 | 0.491 | trnS-UGA |
| Gly        | GGA   | 517  | 1.491 |          | Ser        | UCC   | 502 | 1.354 |          |
| His        | CAC   | 149  | 0.423 | trnH-GUG | Ser        | UCG   | 266 | 0.717 |          |
| His        | CAU   | 555  | 1.577 |          | Ser        | UCU   | 533 | 1.438 |          |
| Ile        | AUU   | 1031 | 1.294 | trnI-CAU | Thr        | ACC   | 413 | 1.151 | trnT-GGU |
| Ile        | AUA   | 715  | 0.897 | trnI-GAU | Thr        | ACA   | 301 | 0.839 | trnT-UGU |
| Ile        | AUC   | 644  | 0.808 |          | Thr        | ACG   | 238 | 0.663 |          |
| Lys        | AAA   | 988  | 1.332 | trnK-UUU | Thr        | ACU   | 483 | 1.346 |          |
| Lys        | AAG   | 495  | 0.668 |          | Val        | GUU   | 403 | 1.387 | trnV-GAC |
| Leu        | CUA   | 184  | 0.648 | trnL-CAA | Val        | GUG   | 186 | 0.64  | trnV-UAC |
| Leu        | CUC   | 261  | 0.92  | trnL-UAA | Val        | GUC   | 206 | 0.709 |          |
| Leu        | CUG   | 205  | 0.722 | trnL-UAG | Val        | GUA   | 367 | 1.263 |          |
| Leu        | CUU   | 485  | 1.709 |          | Trp        | UGG   | 376 | 1     | trnW-CCA |
| Leu        | UUA   | 433  | 0.785 |          | Tyr        | UAC   | 339 | 0.61  | trnY-GUA |
| Leu        | UUG   | 670  | 1.215 |          | Tyr        | UAU   | 773 | 1.39  |          |
| Met        | AUG   | 528  | 1     | trnM-CAU | *          | UGA   | 237 | 0.763 |          |
| Asn        | AAC   | 383  | 0.54  | trnN-GUU | *          | UAG   | 202 | 0.65  |          |
| Asn        | AAU   | 1035 | 1.46  |          | *          | UAA   | 493 | 1.587 |          |

The asterisk (\*) means stop codon.

<https://doi.org/10.1371/journal.pone.0211340.t004>

species were 62.5%, 64.6%, 67.4%, 66%, 66%, 63.8%, 63.2%, 60%, and 50%, respectively (S5 Table). The distribution of SSRs among the nine Asteraceae cp genomes showed that 57.4%–62.7% of these SSRs were localized in LSC, whereas 18.6%–21.9% and 9.3%–10.2% were localized in SSC and IRa/IRb, respectively. Conversely, the rank order of SSR abundance was intergenic spacers (approximately 45.5%) > protein-coding regions (approximately 40.8%) > intron regions (approximately 10.6%) > rRNA regions (approximately 1.6%) > intergenic spacers and protein-coding regions (approximately 0.9%) > tRNA regions (approximately 0.7%). The *ycf1* gene, which was located in the SSC region was the richest region in *Artemisia* species with 12–20 SSRs. The second richest region was the *ycf2* gene of the IR region with 11–12 SSRs. However, the results for *C. boreale*, *S. sessilis*, *D. glutinosum*, and *C. humilis* were different with 15, 21, 18, and 20 SSRs in the *ycf1* gene and 24, 18, 24, and 22 SSRs in the *ycf2* gene, respectively (S5 Table).

Table 5. Characteristics of nine Asteraceae species.

| Species                                 | <i>A. selengensis</i> | <i>A. capillaris</i> | <i>A. frigida</i> | <i>A. gmelinii</i> | <i>A. montana</i> | <i>C. boreale</i> | <i>S. sessilis</i> | <i>D. glutinosum</i> | <i>C. humilis</i> |
|-----------------------------------------|-----------------------|----------------------|-------------------|--------------------|-------------------|-------------------|--------------------|----------------------|-------------------|
| Length (bp)/GC content (%)              | 151215/37.46          | 151056/37.46         | 151076/37.48      | 151318/37.42       | 151130/37.48      | 151012/37.47      | 150784/37.46       | 152229/37.33         | 152585/37.70      |
| Size (bp)/GC content (%) of LSC         | 82920/35.55           | 82821/35.56          | 82740/35.58       | 83061/35.49        | 82873/35.57       | 82817/35.56       | 82958/35.51        | 83954/35.32          | 83622/35.82       |
| Size (bp)/GC content (%) of SSC         | 18367/30.81           | 18309/30.72          | 18392/30.83       | 18335/30.83        | 18339/30.87       | 18281/30.85       | 18338/31.12        | 18233/31.11          | 18651/31.51       |
| Size (bp)/GC content (%) of IR          | 24964/43.09           | 24963/43.08          | 24972/43.06       | 24961/43.06        | 24959/43.08       | 24957/43.08       | 24744/43.10        | 25021/42.97          | 25156/43.13       |
| Size (bp)/GC content (%) of CDS         | 77928/37.84           | 79197/37.71          | 79182/37.77       | 79167/37.76        | 78912/37.77       | 76983/38.02       | 78372/37.75        | 78771/37.88          | 80257/38.03       |
| Size (bp)/GC content (%) of introns     | 17240/36.94           | 17244/36.92          | 17259/36.93       | 17303/36.85        | 17308/36.88       | 15524/37.74       | 16197/37.41        | 16479/37.18          | 16200/37.28       |
| Size (bp)/GC content (%) of rRNA        | 9048/55.08            | 9048/55.08           | 9048/55.08        | 9048/55.08         | 9048/55.08        | 9048/55.08        | 9047/55.18         | 9047/55.18           | 9046/55.23        |
| Size (bp)/GC content (%) of tRNA        | 2798/52.75            | 2798/52.72           | 2806/52.67        | 2798/52.75         | 2806/52.71        | 2723/52.63        | 2692/52.45         | 2694/52.86           | 2726/52.93        |
| Size (bp)/GC content (%) of IGSS        | 44274/32.43           | 42872/32.48          | 42854/32.44       | 43075/32.34        | 43129/32.50       | 46807/32.20       | 44549/32.49        | 45311/31.94          | 44446/32.77       |
| No. of different genes                  | 114                   | 114                  | 114               | 114                | 114               | 113               | 111                | 111                  | 114               |
| No. of different protein-coding genes*  | 80                    | 80                   | 80                | 80                 | 80                | 80                | 79                 | 79                   | 81                |
| No. of different rRNA genes             | 4                     | 4                    | 4                 | 4                  | 4                 | 4                 | 4                  | 4                    | 4                 |
| No. of different tRNA genes             | 30                    | 30                   | 30                | 30                 | 30                | 29                | 28                 | 28                   | 29                |
| No. of different duplicated genes by IR | 18                    | 19                   | 20                | 19                 | 19                | 18                | 19                 | 19                   | 21                |
| No. of genes with introns**             | 21                    | 21                   | 21                | 21                 | 21                | 19                | 20                 | 20                   | 20                |

\* The presence of pseudogenes in the complete genome of *A. frigida*, *A. montana*, *S. sessilis*, *D. glutinosum* (*ycf1*, *rps19*), and *C. humilis* (*ycf1*, *ycf68*, *rps19*).

\*\* Introns losses: one intron missing in *rpl16* (*C. boreale*, *S. sessilis* and *D. glutinosum*).

<https://doi.org/10.1371/journal.pone.0211340.t005>

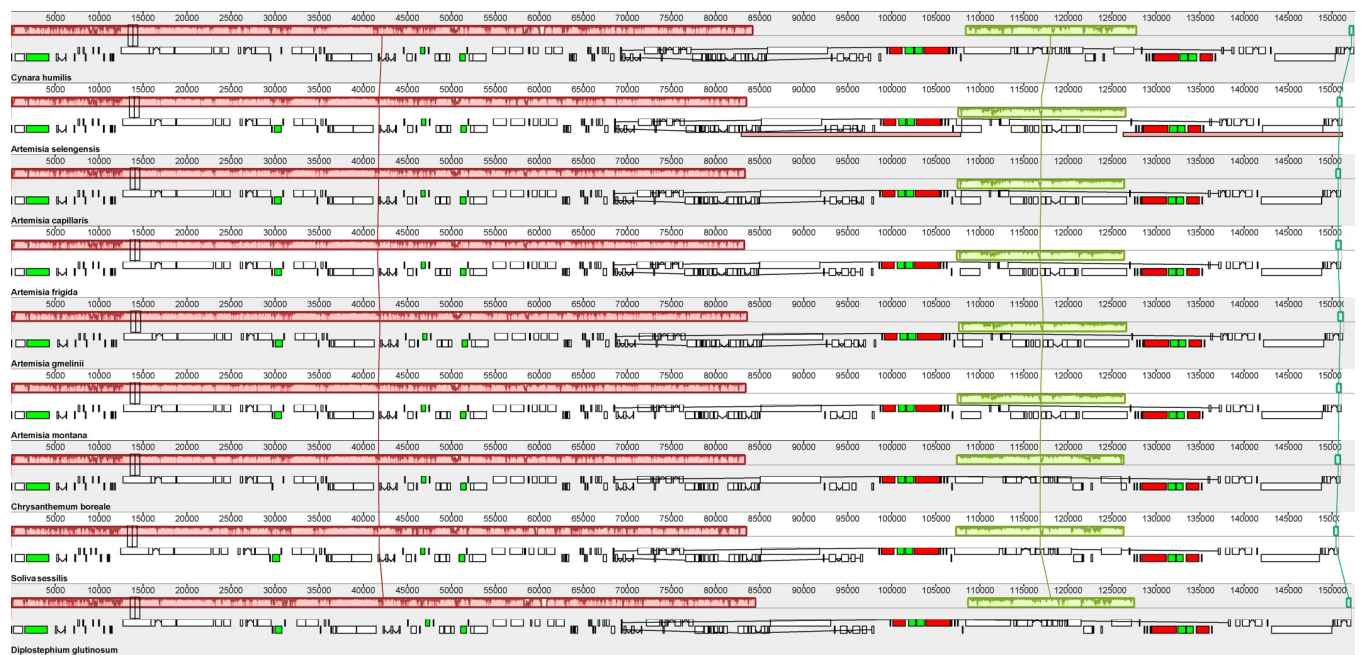

Fig 2. Genomic rearrangement of nine Asteraceae species relative to *C. humilis*. Locally collinear blocks (LCBs) are colored to indicate syntenic regions. Homologous sequences are connected with the same color strand. Histograms of each LCBs corresponds to sequence similarity. Blocks below the center line indicate regions that align in the reverse complement (inverse) orientation. The small boxes below the LCBs of each chloroplast genome are represented as genes.

<https://doi.org/10.1371/journal.pone.0211340.g002>

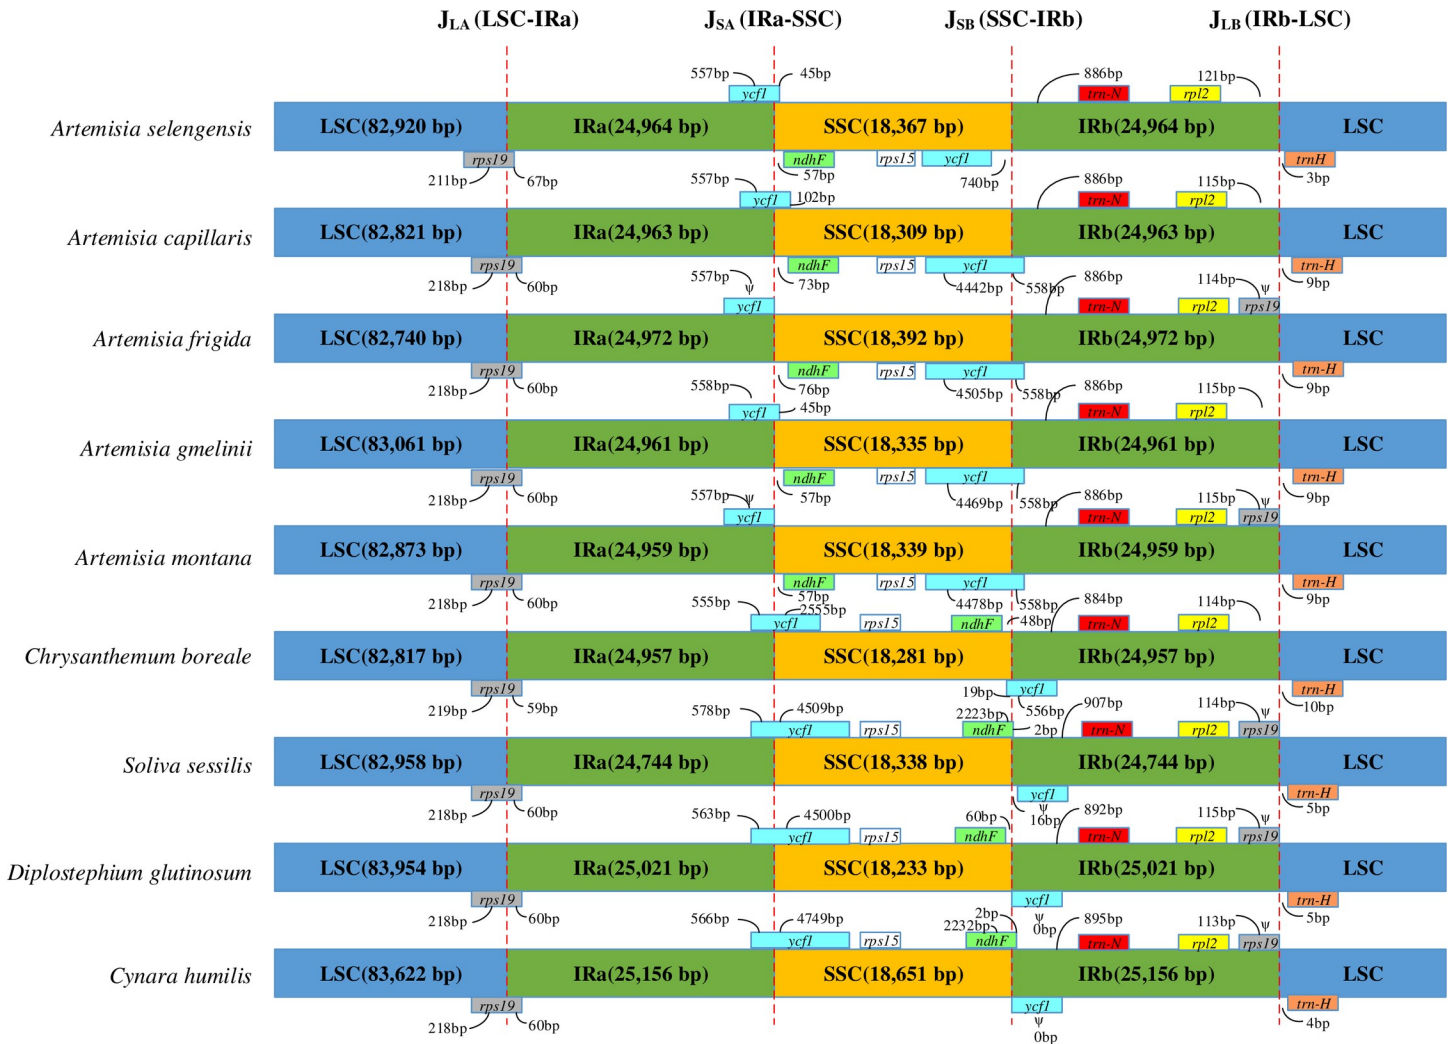

**Fig 3. The expansion and contraction of the inverted repeats (IRs) of nine Asteraceae species relative to *A. selengensis*.** The small boxes of each chloroplast genome are represented as genes. Genes above the larger box correspond to their transcriptions in forward direction and genes below the larger box represent their transcriptions in reverse direction.

<https://doi.org/10.1371/journal.pone.0211340.g003>

In this study, 42, 38, 45, 43, 41, 43, 52, 42, and 38 LDRs were found in *A. selengensis*, *A. capillaris*, *A. frigida*, *A. gmelinii*, *A. montana*, *C. boreale*, *S. sessilis*, *D. glutinosum*, and *C. humilis*, respectively (S6 Table). Most were palindromic repeats and forward repeats. The palindromic repeats accounted for 42.9%, 47.4%, 40.0%, 46.5%, 43.9%, 41.9%, 48.1%, 50%, and 39.5% of the repeats, whereas the positive repeats accounted for 52.4%, 47.4%, 53.3%, 44.2%, 48.8%, 48.8%, 42.3%, 35.7%, and 50%, respectively. In addition, repeats with 30–44 bp lengths were very common in the nine Asteraceae species consisting of 31, 28, 34, 31, 31, 33, 42, 34, and 33, respectively. We also analyzed the distribution of LDRs. Firstly, among these species, 26.3%–39.4% of these repeats were in LSC, whereas 3.5%–34.2%, 19.7%–35.7%, and 19.7%–31.0% were in SSC and Ira/ Irb, respectively. The rich LDRs regions were introns of *ycf3* (LSC), *ycf2*, *rrn4.5-rrn5* (IR) and an intron of *ndhA* (SSC). Additionally, approximately 38.1% of these repeats were localized in the protein-coding regions, whereas around 39.3% were in the intergenic spacers and approximately 13.8% were in the introns. Specifically, except for *A. capillaris*, two dispersed palindromic repeats were found in the *trnS-GGA* gene of the LSC.

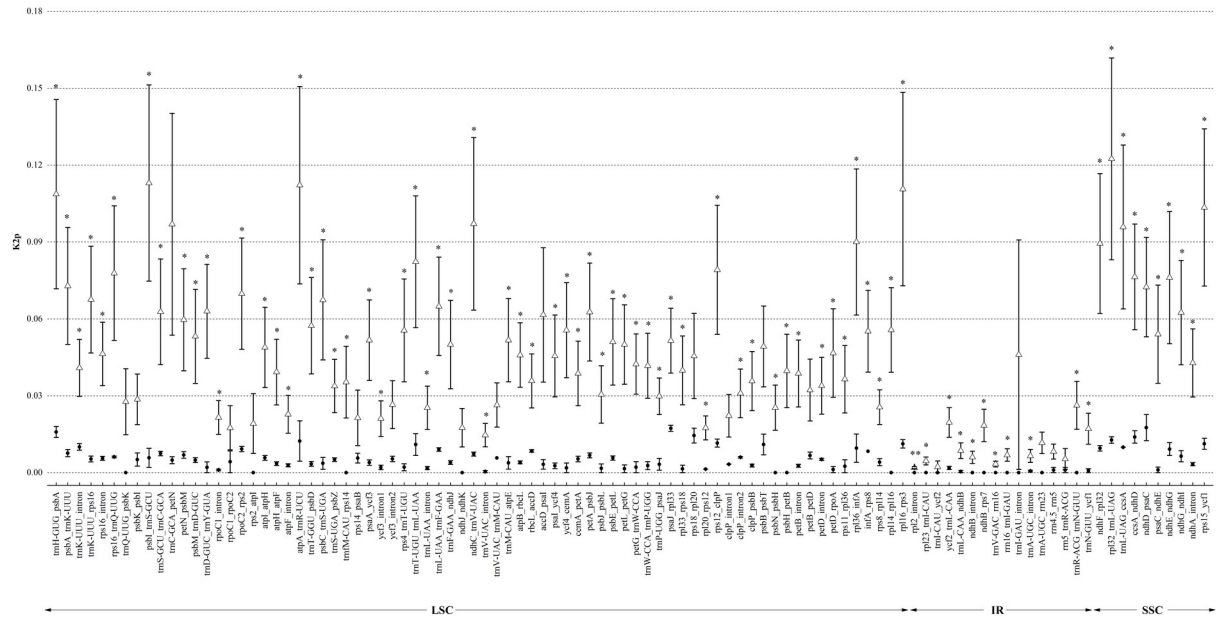

**Fig 4. Kimura's two parameter (K2p) values of introns and intergenic spacers (IGSs) between intro-generic species (within *Artemisia*: *A. selengensis*, *A. capillaris*, *A. frigida*, *A. gmelinii*, *A. montana*) and inter-generic species (other genus of Asteraceae: *A. selengensis*, *C. boreale*, *S. sessilis*, *D. glutinosum*, *C. humilis*).** Black circles represent the mean K2p values of intro-generic species, and blank triangles indicate the mean K2p values of inter-generic species. Bars are mean values ( $\pm$ SE, n = 5). Symbols indicate levels of statistical significance between intro-generic species and inter-generic species: no symbol P > 0.05; \* P = 0.01–0.05; \*\* P < 0.01. X-axis denotes the homologous regions arranged by position.

<https://doi.org/10.1371/journal.pone.0211340.g004>

### Phylogenetic analysis of *A. selengensis*

The NJ phylogenetic tree of five datasets is presented in Fig 6 and S1 Fig. Except for IR and the complete cp genomic tree, *A. selengensis*, *A. annua*, *A. argyi*, *A. capillaris*, *A. frigida*, *A. fukudo*, *A. gmelinii*, *A. montana*, *C. boreale*, *C. indicum*, *C. x morifolium*, and *S. sessilis*, which all belong

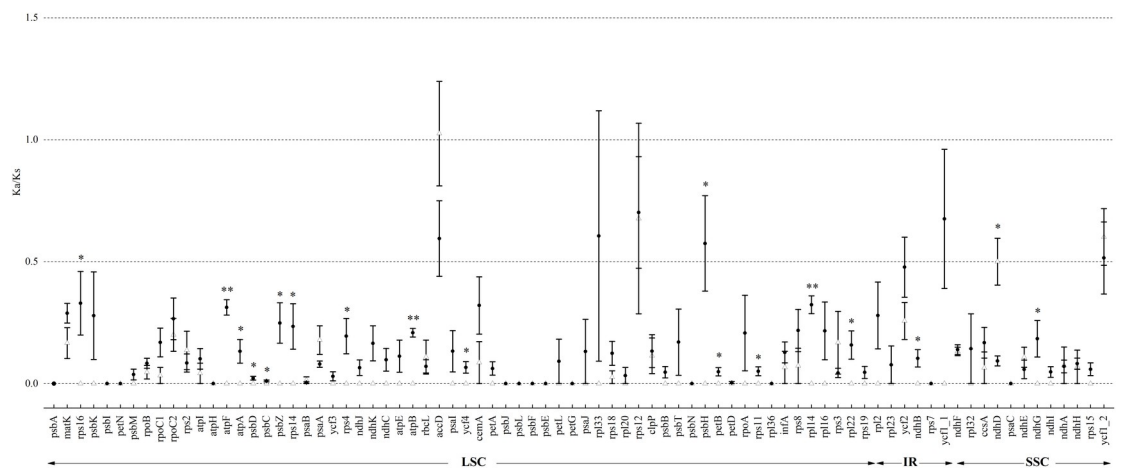

**Fig 5. Ka/Ks ratio of protein-coding genes between intro-generic species (within *Artemisia*: *A. selengensis*, *A. capillaris*, *A. frigida*, *A. gmelinii*, *A. montana*) and inter-generic species (other genus of Asteraceae: *A. selengensis*, *C. boreale*, *S. sessilis*, *D. glutinosum*, *C. humilis*).** Black circles represent the mean Ka/Ks values of intro-generic species, and blank triangles indicate the mean Ka/Ks values of inter-generic species. Bars are mean values ( $\pm$ SE, n = 5). Symbols indicate levels of statistical significance between intro-generic species and inter-generic species: no symbol P > 0.05; \* P = 0.01–0.05; \*\* P < 0.01. X-axis denotes the homologous genes arranged by position.

<https://doi.org/10.1371/journal.pone.0211340.g005>

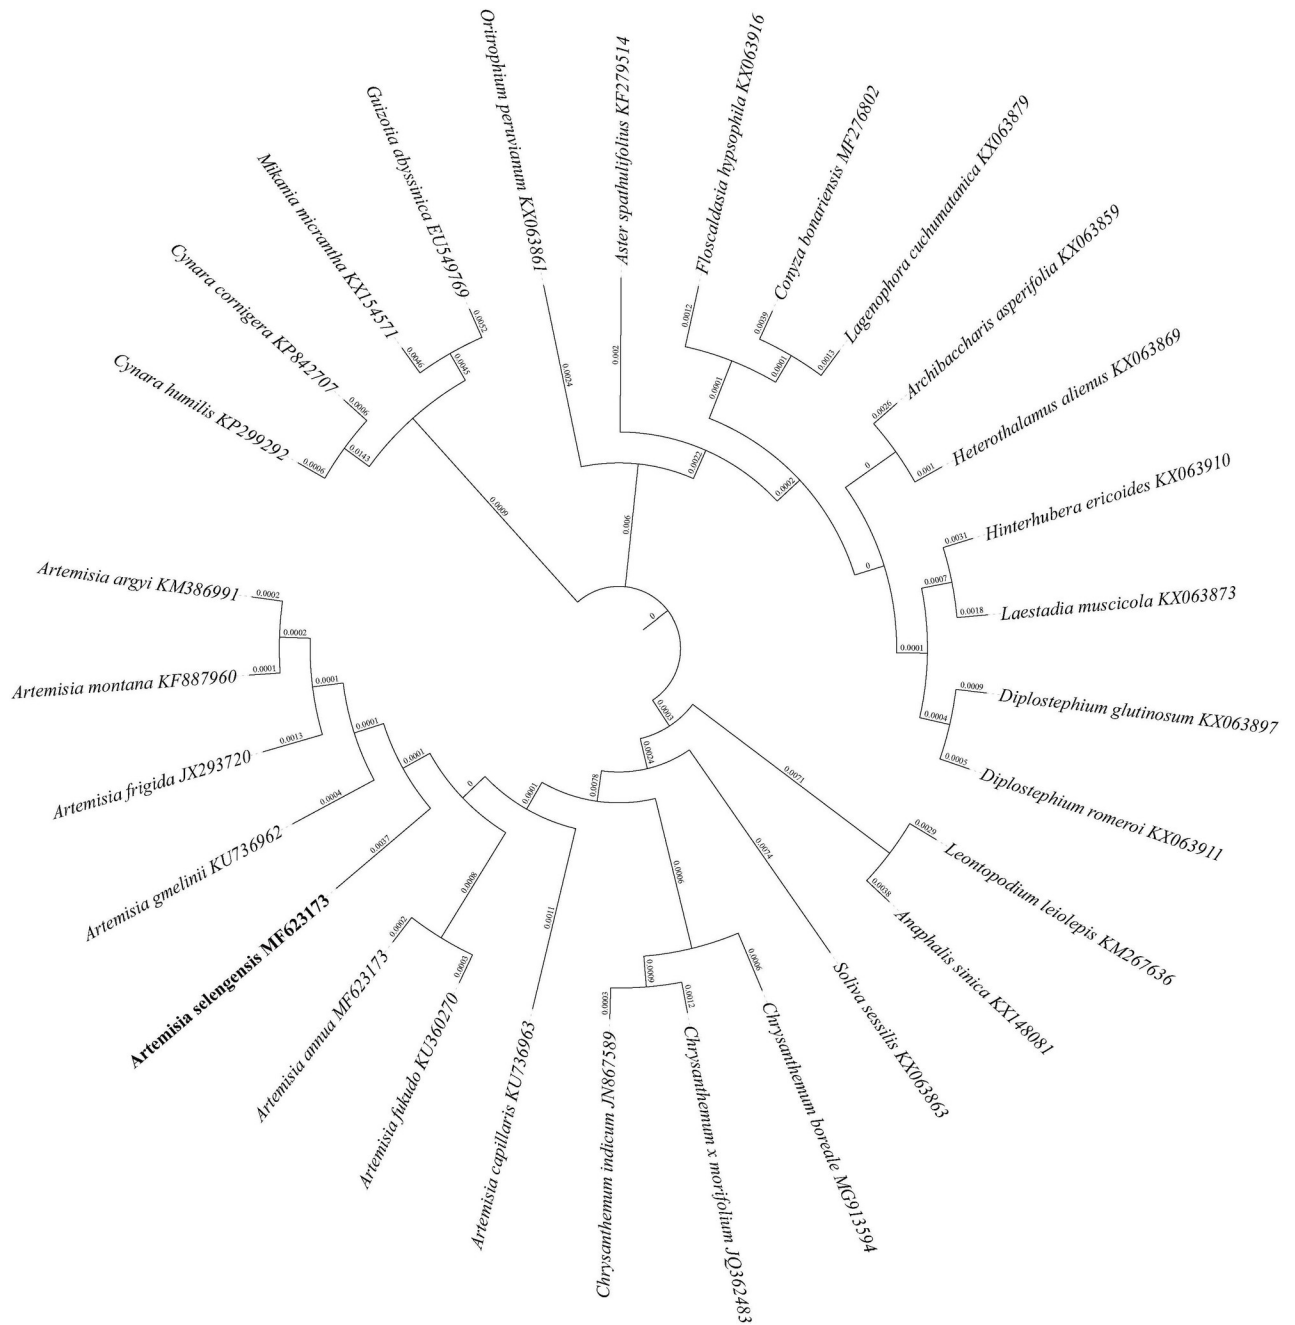

**Fig 6. Phylogenetic relationships based on 72 conserved chloroplast protein-coding sequences shared among 29 Asteraceae species with neighbor-joining (NJ) method. *C. cornigera* and *C. humilis* were selected as the out group.**

<https://doi.org/10.1371/journal.pone.0211340.g006>

to the tribe Anthemideae, were located in the same clade. By analyzing the LSC, SSC, and 72 shared-protein-sequences tree, *S. sessilis* was the well-supported basal taxon, but the relationship between *Artemisia* and *Chrysanthemum* was different. *A. annua* and *A. frigida* formed a new branch, which was a sister group with another branch constituted by the remaining six *Artemisia* species in the LSC and 72 shared-protein-sequences tree. However, this new branch contained five species in the SSC tree: *C. boreale*, *C. indicum*, *C. x morifolium*, *A. annua*, and

*A. frigida*. The evolutionary distances were also calculated. The results showed that the closest species to *A. selengensis* was *A. capillaris* (0.0017), *A. argyi* (0.0027), *A. gmelinii* (0.0040), *A. montana*, and *A. fukudo* (0.0006), and *A. gmelinii* and *A. montana* (0.0042) in the complete cp genome, LSC, SSC, IR, and 72 shared-protein-sequences trees, respectively.

## Discussion and conclusion

The genomic length of chloroplast within the *Artemisia* genus was similar, ranging from 151,056 bp (*A. capillaris*) to 151,318 bp (*A. gmelinii*) with only a 255 bp difference. Moreover, the available cp genomes of *Artemisia* had conserved genomic organization, GC contents, and gene order (Table 3). Like most angiosperms, *A. selengensis* had a typical quadripartite structure and is an AT-rich species. The GC content of *A. selengensis* (37.46%) was quite similar to that of other Asteraceae species, such as *A. capillaris* (37.46%) [25], *A. frigida* (37.48%) [23], *A. annua* (37.48%) [24], and *S. sessilis* (37.46%) [41] belonging to the order Asteroideae, and other species in the order Carduoideae, such as *C. humilis* (37.70%) and *C. cornigera* (37.71%) [56].

However, when we compared *A. selengensis* with other genera in the Asteraceae family, some differences which may indicate evolutionary events were found. Normally, the SSC region of most Asteraceae species has been inverted relative to the *Nicotiana tabacum* chloroplast genome, which is often regarded to be unaltered [57]. However, in our study, we noticed that the SSC region of five species within the *Artemisia* genus had no rearrangement but was inverted in comparison with other genera in the Asteraceae family. This event is in agreement with a previous study on *A. frigida*, which has been called “re-inversion” [23]. Actually, except for *Artemisia* species, this re-inversion event was also found in *Carthamus tinctorius* (KP404628) [58], *Centaurea diffusa* (NC024286), and one reported *Lactuca sativa* (NC007578) [59]. One possible explanation for these results may be that the SSR region is an inversion “hotspot” and the re-inversion event can be noticed in closely related individuals. However, even in individual plants, there will be SSC re-inversion events as well. For example, the SSC regions of two cp genome sequences of *Lactuca sativa* (NC007578 and DQ383816) presented different orientations [60, 61]. Although some hypotheses have been proposed for the mechanism of different SSC orientations within and among individuals, including intramolecular recombination between the two IR regions [60] and recombination-dependent DNA replication of the cp genome [62], the regulation mechanism of the presence of the re-inversion event within and among individuals is still unclear.

The border between four junctions usually differs among plants [63]. Detailed comparisons of IR boundaries of intro-generic and inter-generic species in the Asteraceae family suggested that wide ranges of expansions and contractions of IR are very common evolutionary events. As a result, the pseudogenes, *ycf1* and *rps19*, were present at the IRa/SSC and IRb/LSC boundaries, respectively. We also identified an unequal duplicate phenomenon of the *ycf1* gene and overlapped regions between *ycf1* and *ndhF*. Actually, the sizes of IRs can change from 10 kb (in liverworts) to 76 kb (in *Pelargonium*) in land plants [64, 65]. Most angiosperms have a 20–25 kb IRs. Wang et al. (2008) proposed three types to explain the expansion and contraction of IR/LSC junctions in angiosperms. Type I relates to intact *trnH* and *rps19* genes being seated in IRa and IRb, respectively, and *rps19* is seated downstream of *trnH*. In Type II there is a partial *rps19* in IRa, which is situated between *rpl2* and *trnH*. This type coincides with our study and has been found in some eudicots. Type III relates to the same *trnH-rps19* cluster in IRa or IRb. Several mechanisms have been proposed to explain why successive IR expansions can lead to floating of the four junctions, such as homologous dispersed repeat recombination in *Gernium* [66].

Except for the large-scale evolutionary events in the cp genome of *A. selengensis*, we also identified the most variable regions by calculating the pairwise distances of IGSs, introns, and protein-coding sequences of nine Asteraceae species relative to *A. selengensis*. K2p values are an effective method for estimating evolutionary rates of nucleotide sequences [46]. In our study, the *ndhD\_psaC* (116 bp), *psaJ\_rpl33* (439 bp), *trnH-GUG\_psbA* (382 bp), *rps18\_rpl20* (264 bp), *ccsA\_ndhD* (200 bp), and *rpl32\_trnL-UAG* (880 bp), which presented higher K2p values, indicated that these regions exhibited accelerated mutation rates within the *Artemisia* genus. The Ka/Ks ratio is used to evaluate whether selective pressure acts on protein-coding genes and is an important indicator for studying gene evolution. When  $Ka/Ks > 1$  ( $= 1$ ;  $< 1$ ), the gene was subjected to positive selection (neutral selection; purifying selection) [46]. In our study, *accD* evolved under beneficial mutations with a Ka/Ks ratio  $> 1$ . Three genes (*rps12*, *ycf1\_2*, *ndhD*), ranging from 0.5000 to 0.6770) suffered from neutral selection with a Ka/Ks ratio  $> 0.5$ .

Repeats play an important role in various rearrangements, such as additions, deletions, or large inversions [47]. Therefore, we analyzed SSRs and LDRs in cp genomes of the nine Asteraceae species and found 220–279 SSRs and 38–52 LDRs in each individual. Mono-nucleotide, palindromic, and forward repeats were the most common repeated sequences. Nine Asteraceae cp genomes presented a highly similar pattern of SSRs or LDRs distribution. Firstly, more than half of the SSRs was present in the LSC region, and approximately 45.5% and 40.8% of SSRs were in IGSs and protein-coding regions, respectively. Secondly, approximately 30% of LDRs were localized in the LSC, IRa, or IRb regions, approximately 39% of LDRs were in IGSs or the protein-coding regions. The same situation is also found in other species, such as Fabaceae [47] and Sapindaceae species. Then, we associated repeat distribution with different regions and found that *ycf2*, *ycf1*, *ycf3*, *rrn4.5* and *rrn5* were the richest regions ( $n > 10$ ). In a word, these SSCs and LDRs present in our study represent important genetic marker resources that can be used to expand research on *Artemisia* species.

Five datasets, including the complete cp genomes, LSC, IR, SSC DNA sequences, and 72 shared protein sequences, reconstructed the *Artemisia* and *Asteraceae* phylogenetic relationship. However, different datasets produced different topological structures (Fig 6 and S1 Fig). Among them, LSC and the 72 shared-protein-sequences tree showed the most similar topological structures and were consistent with the phylogeny of 21 Korean *Artemisia* species reconstructed by *trnL-trnF* markers [27]. However, although some *Artemisia* cp data have been published, other studies contained only one to four *Artemisia* species [22–26], and it is difficult to obtain more phylogenetic data to support our results.

In summary, a new cp genomic resource *A. selengensis* was presented. This study filled the gap in *A. selengensis* genomic resources, and provides novel insights into evolutionary dynamics in an important medicinal resource clade: *Artemisia*. Our results revealed that the available cp genomes of *Artemisia* were well conserved in terms of genomic length, GC contents, gene organization, and order. Furthermore, some differences, which may indicate evolutionary events, were found. Firstly, a re-inversion event of the SSC region within the *Artemisia* genus was identified, but the regulation mechanism of the presence of the re-inversion event within and among individuals is still unclear. Secondly, the pseudogenes *ycf1* and *rps19*, an unequal duplicate phenomenon of the *ycf1* gene, and overlapping regions between *ycf1* and *ndhF* were identified at the IR/SSC or IR/LSC boundaries because of the expansion and contraction of the IR region. Last but not least, the highly variable regions (*ndhD\_psaC*, *psaJ\_rpl33*, *trnH-GUG\_psbA*, *rps18\_rpl20*, *ccsA\_ndhD*, *rpl32\_trnL-UAG*, *accD*, *rps12*, *ycf1\_2* and *ndhD*) within *Artemisia*, which indicated fast-evolving events, were found. The analysis of repeated sequences showed that Asteraceae cp genomes presented a highly similar pattern of SSRs or LDRs distribution. The phylogenetic analysis of five datasets showed that LSC and 72 shared-protein-

sequences may be more useful in the reconstructed *Artemisia* and *Asteraceae* phylogenetic relationship. This study will be useful for further studies to illuminate the genetic diversity and evolutionary history of *Asteraceae*.

## Supporting information

**S1 Table. K2p values of introns and intergenic spacers of nine *Asteraceae* species relative to *A. selengensis* (AS).**

(XLSX)

**S2 Table. Non-synonymous mutation rate of protein-coding sequences of nine *Asteraceae* species relative to *A. selengensis* (AS).**

(XLSX)

**S3 Table. Synonymous mutation rate of protein-coding sequences of nine *Asteraceae* species relative to *A. selengensis* (AS).**

(XLSX)

**S4 Table. Ka/Ks ratio of protein-coding sequences of nine *Asteraceae* species relative to *A. selengensis* (AS).**

(XLSX)

**S5 Table. Simple sequence repeats in the nine *Asteraceae* chloroplast genomes investigated in this study.**

(XLSX)

**S6 Table. Longer dispersed repeats in the nine *Asteraceae* chloroplast genomes investigated in this study.**

(XLSX)

**S1 Fig.** Phylogenetic relationships based on whole chloroplast genomes (A), LSC region (B), SSC region (C), and IR region (D) 72 among 29 *Asteraceae* species with neighbor-joining (NJ) method.

(TIF)

## Author Contributions

**Funding acquisition:** Dong Meng, Zhou Xiaomei.

**Investigation:** Ku Wenzhen.

**Software:** Ku Wenzhen.

**Writing – original draft:** Dong Meng.

**Writing – review & editing:** Zhenggang Xu.

## References

1. Panero JL, Funk VA. Toward a Phylogenetic Subfamilial Classification for the Compositae (*Asteraceae*). *Proceedings of the Biological Society of Washington*. 2002; 115(4): 909–922.
2. Panero JL, Al E. Resolution of deep nodes yields an improved backbone phylogeny and a new basal lineage to study early evolution of *Asteraceae*. *Molecular Phylogenetics & Evolution*. 2014; 80(5): 43–53.
3. Fu ZX, Jiao BH, Nie B, Zhang GJ, Gao TG. A comprehensive generic-level phylogeny of the sunflower family: Implications for the systematics of Chinese *Asteraceae*. *Journal of Systematics & Evolution*. 2016; 54(4): 416–437.



4. Malagón F, Vázquez J, Delgado G, Ruiz A. Antimalaric effect of an alcoholic extract of *Artemisia ludoviciana mexicana* in a rodent malaria model. *Parassitologia*. 1997; 39(1): 3–7. PMID: [9419840](#)
5. Dhingra V, Vishweshwar RK, Lakshmi NM. Current status of artemisinin and its derivatives as antimalarial drugs. *Life Sciences*. 2000; 66(4): 279–300. PMID: [10665980](#)
6. Newton P, BM, DPhil, and M, White N, MD, et al. MALARIA: New Developments in Treatment and Prevention. *Annual Review of Medicine*. 1999; 50(50): 179–192.
7. Tu Y. Artemisinin-A Gift from Traditional Chinese Medicine to the World (Nobel Lecture). *Cheminform*. 2016; 47(41): 10210–10226.
8. Koo KA, Kwak JH, Kang RL, Zee OP, Woo ER, Park HK, et al. Antitumor and immunomodulating activities of the polysaccharide fractions from *Artemisia selengensis* and *Artemisia iwayomogi*. *Archives of Pharmacol Research*. 1994; 17(5): 371–374.
9. Shi F, Jia X, Zhao C, Chen Y. Antioxidant activities of various extracts from *Artemisia selengensis* Turcz (LuHao). *Molecules*. 2010; 15(7): 4934–4946. <https://doi.org/10.3390/molecules15074934> PMID: [20657401](#).
10. Palmer JD. Comparative organization of chloroplast genomes. *Annurevgenet*. 1985; 19(1): 325–354.
11. Yoon HS, Hackett JD, Bhattacharya D. A Genomic and Phylogenetic Perspective on Endosymbiosis and Algal Origin. *Journal of Applied Phycology*. 2006; 18(3–5): 475–481.
12. Palmer JD, Osorio B, Thompson WF. Evolutionary significance of inversions in legume chloroplast DNAs. *Current Genetics*. 1988; 14(1): 65–74.
13. Kanno A, Hirai A. A transcription map of the chloroplast genome from rice (*Oryza sativa*). *Current Genetics*. 1993; 23(2): 166–174. PMID: [8381719](#)
14. Woodbury NW, Roberts LL, Palmer JD, Thompson WF. A transcription map of the pea chloroplast genome. *Current Genetics*. 1988; 14(1): 75–89.
15. Raubeson LA, Jansen RK. Chloroplast genomes of plants, Plant diversity and evolution: genotypic and phenotypic variation in higher plants. 2005.
16. Jansen RK, Cai Z, Raubeson LA, Daniell H, Depamphilis CW, Leebens-Mack J, et al. Analysis of 81 genes from 64 plastid genomes resolves relationships in angiosperms and identifies genome-scale evolutionary patterns. *Proceedings of the National Academy of Sciences of the United States of America*. 2007; 104(49): 19369–19374. <https://doi.org/10.1073/pnas.0709121104> PMID: [18048330](#)
17. Moore MJ, Soltis PS, Bell CD, Burleigh JG, Soltis DE. Phylogenetic analysis of 83 plastid genes further resolves the early diversification of eudicots. *Proceedings of the National Academy of Sciences of the United States of America*. 2010; 107(10): 4623. <https://doi.org/10.1073/pnas.0907801107> PMID: [20176954](#)
18. Zhu A, Guo W, Gupta S, Fan W, Mower JP. Evolutionary dynamics of the plastid inverted repeat: the effects of expansion, contraction, and loss on substitution rates. *New Phytologist*. 2016; 209(4): 1747–1756. <https://doi.org/10.1111/nph.13743> PMID: [26574731](#)
19. Turuspekov Y, Genievskaia Y, Baibulatova A, Zatybekov A, Kotuhov Y, Ishmuratova M, et al. Phylogenetic Taxonomy of *Artemisia* L. Species from Kazakhstan Based on Matk Analyses. *Proceedings of the Latvian Academy of Sciences Section B Natural, Exact, and Applied Sciences*. 2018; 72(1): 29–37. <https://doi.org/10.1515/prolas-2017-0068>.
20. Haghighi AR, Belduz AO, Vahed MM, Coskuncelebi K, Terzioglu S. Phylogenetic relationships among *Artemisia* species based on nuclear ITS and chloroplast psbA-trnH DNA markers. *Biologia*. 2014; 69(7): 834–839. <https://doi.org/10.2478/s11756-014-0379-3>.
21. Tariq M, Nadia H, Nazia N, Ishrat N. Phylogenetic analysis of different *Artemisia* species based on chloroplast gene rps11. *Archives of Biological Sciences*. 2011; 63(3): 661–665. <https://doi.org/10.2298/ABS1103661M>.
22. Pellicer J, Garnatje T. Phylogenetic relationships of *Artemisia* subg. *Dracunculus* (Asteraceae) based on ribosomal and chloroplast DNA sequences. *Taxon*. 2011; 60(3). <https://doi.org/TRNS-TRNFM>.
23. Liu Y, Huo N, Dong L, Wang Y, Zhang S, Young HA, et al. Complete chloroplast genome sequences of Mongolia medicine *Artemisia frigida* and phylogenetic relationships with other plants. *PLoS One*. 2013; 8(2): e57533. <https://doi.org/10.1371/journal.pone.0057533> PMID: [23460871](#).
24. Shen X, Wu M, Liao B, Liu Z, Bai R, Xiao S, et al. Complete Chloroplast Genome Sequence and Phylogenetic Analysis of the Medicinal Plant *Artemisia annua*. *Molecules*. 2017; 22(8). <https://doi.org/10.3390/molecules22081330> PMID: [28800082](#).
25. Lee YS, Park JY, Kim J-K, Lee HO, Park H-S, Lee S-C, et al. The complete chloroplast genome sequences of *Artemisia gmelinii* and *Artemisia capillaris* (Asteraceae). *Mitochondrial DNA Part B*. 2016; 1(1): 410–411. <https://doi.org/10.1080/23802359.2016.1176880>.

26. Lee YS, Park JY, Kim J-K, Lee HO, Park H-S, Lee S-C, et al. Complete chloroplast genome sequence of *Artemisia fukudo* Makino (Asteraceae). *Mitochondrial DNA Part B*. 2016; 1(1): 376–377. <https://doi.org/10.1080/23802359.2016.1155426>.
27. Jeonghoon L, Jeiwan L, Jungsook S, Bang KH, Sunggi M. Molecular authentication of 21 Korean *Artemisia* species (Compositae) by polymerase chain reaction-restriction fragment length polymorphism based on trnL-F region of chloroplast DNA. *Biological & Pharmaceutical Bulletin*. 2009; 32(11): 1912–1916. <https://doi.org/10.1248/bpb.32.1912>.
28. Zhang W, Zhao YL, Yang GY, Tang YC, Xu ZG. Characterization of the complete chloroplast genome sequence of *Camellia oleifera* in Hainan, China. *Mitochondrial DNA Part B*. 2017; 2(2): 843–844. <https://doi.org/10.1080/23802359.2017.1407687>.
29. Yang G, Zhang W, Liu Z, Yi-Maer AY, Zhai M, Xu Z. JrWRKY2 and JrWRKY7 of *Juglans regia* mediate responses to abiotic stresses and abscisic acid by formation of homodimers and interaction. *Plant biology*. 2017; 19(2): 268–278. <https://doi.org/10.1111/plb.12524> MEDLINE: PMID: 27860167.
30. Bolger AM, Lohse M, Usadel B. Trimmomatic: a flexible trimmer for Illumina sequence data. *Bioinformatics*. 2014; 30(15): 2114–2020. <https://doi.org/10.1093/bioinformatics/btu170> PMID: 24695404
31. Andrews S. FastQC A Quality Control tool for High Throughput Sequence Data 2014 [1 September 2017]. Available from: <http://www.bioinformatics.babraham.ac.uk/projects/fastqc/>.
32. Luo R, Liu B, Xie Y, Li Z, Huang W, Yuan J, et al. SOAPdenovo2: an empirically improved memory-efficient short-read de novo assembler. *GigaScience*. 2012; 1(1): 18. <https://doi.org/10.1186/2047-217X-1-18> PMID: 23587118
33. Boetzer M, Henkel CV, Jansen HJ, Butler D, Pirovano W. Scaffolding pre-assembled contigs using SSPACE. *Bioinformatics*. 2011; 27(4): 578–579. <https://doi.org/10.1093/bioinformatics/btq683> PMID: 21149342
34. Wyman SK, Jansen RK, Boore JL. Automatic annotation of organellar genomes with DOGMA. *Bioinformatics*. 2004; 20(17): 3252–3255. <https://doi.org/10.1093/bioinformatics/bth352> PMID: 15180927
35. Ed L, Nomi H, Mark G, Raymond C, Suzanna L. Apollo: a community resource for genome annotation editing. *Bioinformatics*. 2009; 25(14): 1836–1837. <https://doi.org/10.1093/bioinformatics/btp314> WOS:000267665900020. PMID: 19439563
36. Lohse M, Drechsel O, Bock R. OrganellarGenomeDRAW (OGDRAW): a tool for the easy generation of high-quality custom graphical maps of plastid and mitochondrial genomes. *Current Genetics*. 2007; 52(5–6): 267–274. <https://doi.org/10.1007/s00294-007-0161-y> PMID: 17957369
37. Lohse M, Drechsel O, Kahlau S, Bock R. OrganellarGenomeDRAW—a suite of tools for generating physical maps of plastid and mitochondrial genomes and visualizing expression data sets. *Nucleic Acids Research*. 2013; 41(Web Server issue): 575–581. <https://doi.org/10.1093/nar/gks1075> PMID: 23161687
38. Peng J, Zhao Y, Li C, Xu Z. The complete chloroplast genome and phylogeny of *Artemisia selengensis* in Dongting Lake. *Mitochondrial DNA Part B*. 2018; 3(2): 909–910. <https://doi.org/10.1080/23802359.2018.1501322>.
39. Xia X. DAMBE6: New Tools for Microbial Genomics, Phylogenetics, and Molecular Evolution. *Journal of Heredity*. 2017; 108(4): 431–437. <https://doi.org/10.1093/jhered/esx033> PMID: 28379490
40. Won SY, Jung JA, Kim JS. The complete chloroplast genome of *Chrysanthemum boreale* (Asteraceae). 2018; 3(2): 549–550.
41. Vargas OM, Ortiz EM, Simpson BB. Conflicting phylogenomic signals reveal a pattern of reticulate evolution in a recent high-Andean diversification (Asteraceae: Astereae: Diplostephium). *New Phytol*. 2017; 214(4): 1736–1750. <https://doi.org/10.1111/nph.14530> PMID: 28333396.
42. Curci PL, Sonnante G. The complete chloroplast genome of *Cynara humilis*. *Mitochondrial Dna*. 2015; (4): 1–2. <https://doi.org/10.3109/19401736.2015.1013392> PMID: 25693712
43. Darling AC, Mau B, Blattner FR, Perna NT. Mauve: Multiple Alignment of Conserved Genomic Sequence With Rearrangements. *Genome Research*. 2004; 14(7): 1394–1403. <https://doi.org/10.1101/gr.2289704> PMID: 15231754
44. Katoh K, Standley DM. MAFFT multiple sequence alignment software version 7: improvements in performance and usability. *Molecular Biology & Evolution*. 2013; 30(4): 772–780.
45. Kumar S, Stecher G, Tamura K. MEGA7: Molecular Evolutionary Genetics Analysis Version 7.0 for Bigger Datasets. *Molecular Biology & Evolution*. 2016; 33(7): 1870–1874.
46. Kimura M. A simple method for estimating evolutionary rates of base substitutions through comparative studies of nucleotide sequences. *Journal of Molecular Evolution*. 1980; 16(2): 111–120. <https://doi.org/10.1007/BF01731581>. PMID: 7463489
47. Keller J, Rousseau-Gueutin M, Martin GE, Morice J, Boutte J, Coissac E, et al. The evolutionary fate of the chloroplast and nuclear rps16 genes as revealed through the sequencing and comparative analyses

- of four novel legume chloroplast genomes from *Lupinus*. *Dna Research*. 2017; 24(4): 343–358. <https://doi.org/10.1093/dnares/dsx006> PMID: 28338826
48. Yang Z, Yang ZH. PAML 4: Phylogenetic analysis by maximum likelihood. *Mol Biol Evol* 24: 1586–1591. 2007; 24(8): 1586–1591. <https://doi.org/10.1093/molbev/msm088> PMID: 17483113
  49. Yang Z, Nielsen R. Synonymous and nonsynonymous rate variation in nuclear genes of mammals. *Journal of Molecular Evolution*. 1998; 46(4): 409–418. PMID: 9541535
  50. Thiel T, Michalek W, Varshney RK, Graner A. Exploiting EST databases for the development and characterization of gene-derived SSR-markers in barley (*Hordeum vulgare* L.). *Theoretical & Applied Genetics*. 2003; 106(3): 411–422.
  51. Benson G. Tandem repeats finder: a program to analyze DNA sequences. *Nucleic Acids Research*. 1999; 27(2): 573–580. PMID: 9862982
  52. Kurtz S, Choudhuri JV, Ohlebusch E, Schleiermacher C, Stoye J, Giegerich R. REPuter: the manifold applications of repeat analysis on a genomic scale. *Nucleic Acids Research*. 2001; 29(22): 4633–4642. PMID: 11713313
  53. Zhang Z, Schwartz S, Wagner L, Miller W. A greedy algorithm for aligning DNA sequences. *Journal of computational biology: a journal of computational molecular cell biology*. 2000; 7(1–2): 203–214. <https://doi.org/10.1089/10665270050081478> MEDLINE: PMID: 10890397.
  54. Kumar S, Stecher G, Tamura K. MEGA7: Molecular Evolutionary Genetics Analysis version 7.0 for bigger datasets. *Molecular Biology & Evolution*. 2016; 33(7): 1870. <https://doi.org/10.1093/molbev/msw054>.
  55. Saina JK, Gichira AW, Li ZZ, Hu GW, Wang QF, Liao K. The complete chloroplast genome sequence of *Dodonaea viscosa*: comparative and phylogenetic analyses. *Genetica*. 2018; 146(1): 101–113. <https://doi.org/10.1007/s10709-017-0003-x> PMID: 29170851.
  56. Curci PL, De Paola D, Sonnante G. Development of chloroplast genomic resources for *Cynara*. *Molecular Ecology Resources*. 2016; 16(2): 562–573. <https://doi.org/10.1111/1755-0998.12457>. PMID: 26354522
  57. Heinze B, M. Salih RH, Majeský L, Schwarzacher T, Gornall R, Heslop-Harrison P. Complete chloroplast genomes from apomictic *Taraxacum* (Asteraceae): Identity and variation between three microspecies. *Plos One*. 2017; 12(2): e0168008. <https://doi.org/10.1371/journal.pone.0168008>. PMID: 28182646
  58. Lu C, Shen Q, Yang J, Wang B, Song C. The complete chloroplast genome sequence of Safflower (*Carthamus tinctorius* L.). *Mitochondrial Dna*. 2015; 27(5): 1–3.
  59. Kanamoto H, Yamashita A, Okumura S, Hattori M, Tomizawa KI. The complete genome sequence of the *Lactuca sativa* (lettuce) chloroplast. Meeting of the Japanese-Society-For-Plant-Physiologists. 2004: S39–S39.
  60. Palmer JD. Chloroplast DNA exists in two orientations. *Nature*. 1983; 301(5895): 92–93. <https://doi.org/10.1038/301092a0>.
  61. Walker JF, Jansen RK, Zanis MJ, Emery NC. Sources of inversion variation in the small single copy (SSC) region of chloroplast genomes. *American Journal of Botany*. 2015; 102(11). <https://doi.org/10.3732/ajb.1500299>.
  62. Oldenburg DJ, Bendich AJ. Most chloroplast DNA of maize seedlings in linear molecules with defined ends and branched forms. *Journal of Molecular Biology*. 2004; 335(4): 953–970. <https://doi.org/10.1016/j.jmb.2003.11.020>. PMID: 14698291
  63. Kim KJ, Lee HL. Complete chloroplast genome sequences from Korean ginseng (*Panax schinseng* Nees) and comparative analysis of sequence evolution among 17 vascular plants. *Dna Research*. 2004; 11(4): 247–261. PMID: 15500250
  64. Chumley TW, Palmer JD, Mower JP, Fourcade HM, Calie PJ, Boore JL, et al. The complete chloroplast genome sequence of *Pelargonium x hortorum*: organization and evolution of the largest and most highly rearranged chloroplast genome of land plants. *Molecular Biology & Evolution*. 2006; 23(11): 2175–2190. <https://doi.org/10.1093/molbev/msl089>.
  65. Wang R-J, Cheng C-L, Chang C-C, Wu C-L, Su T-M, Chaw S-M. Dynamics and evolution of the inverted repeat-large single copy junctions in the chloroplast genomes of monocots. *BMC Evolutionary Biology*. 2008; 8(1): 36. <https://doi.org/10.1186/1471-2148-8-36>.
  66. Palmer JD, Nugent JM, Herbon LA. Unusual structure of geranium chloroplast DNA: A triple-sized inverted repeat, extensive gene duplications, multiple inversions, and two repeat families. *Proceedings of the National Academy of Sciences of the United States of America*. 1987; 84(3): 769–773. <https://doi.org/10.1073/pnas.84.3.769>. PMID: 16593810
